# Supplementary material
Source: Springer Nature journal article supplement (https://www.springermedizin.de/resource/supplementary/12974_2010_375_MOESM7_ESM.pdf/9601522)

**7A**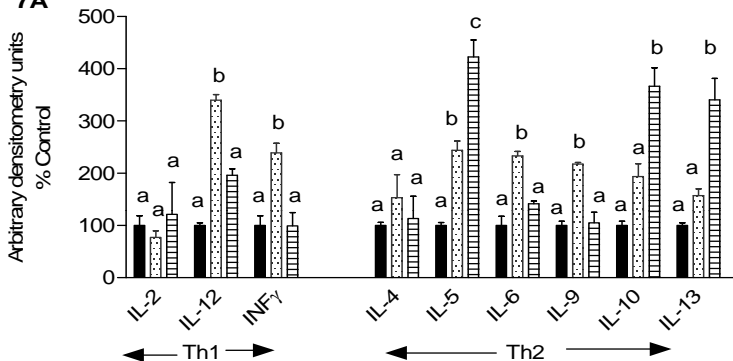**7B**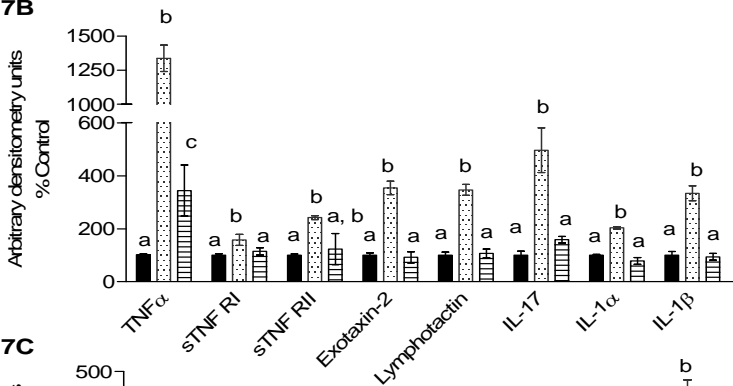**7C**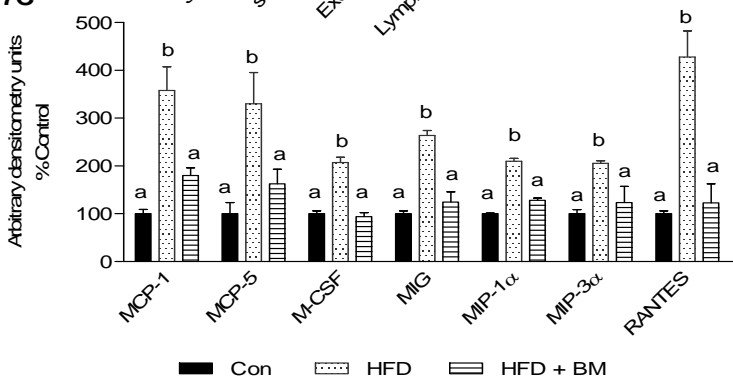

Supplement: MOESM7 [file 9601522]
